# Supplementary material for: Tuning the Binding Affinity of Heme-Responsive Biosensor for Precise and Dynamic Pathway Regulation
Source: PubMed Central journal article supplement — iScience. 2020 Apr 18;23(5):101067. doi: 10.1016/j.isci.2020.101067 (PMC7200772; doi:10.1016/j.isci.2020.101067), 2020-04-18
Supplement: mmc1.pdf [file mmc1.pdf]

iScience, Volume 23

## **Supplemental Information**

### **Tuning the Binding Affinity of Heme-Responsive Biosensor for Precise and Dynamic Pathway Regulation**

**Jian Zhang, Zhiguo Wang, Tianyuan Su, Huanhuan Sun, Yuan Zhu, Qingsheng Qi, and Qian Wang**

1 **Supplementary Files**

2 **Tuning the binding affinity of heme-responsive biosensor for precise**  
3 **and dynamic pathway regulation**

4  
5 Jian Zhang<sup>1</sup>, Zhiguo Wang<sup>2</sup>, Tianyuan Su<sup>1</sup>, Huanhuan Sun<sup>1</sup>, Yuan Zhu<sup>1</sup>, Qingsheng Qi<sup>1,3\*</sup>,  
6 Qian Wang<sup>1\*</sup>

- 7  
8 1. State Key Laboratory of Microbial Technology, National Glycoengineering Research Center,  
9 Shandong University, Qingdao 266237, P. R. China  
10 2. Institute of Ageing Research, School of Medicine, Hangzhou Normal University, Hangzhou,  
11 311121, P. R. China  
12 3. CAS Key Lab of Biobased Materials, Qingdao Institute of Bioenergy and Bioprocess Technology,  
13 Chinese Academy of Sciences, Qingdao 266101, P. R. China  
14

15  
16 \*Corresponding authors:

17 Qingsheng Qi

18 Tel: 0532-58632580, E-mail: qiqingsheng@sdu.edu.cn;

19 Qian Wang

20 Tel: 0532-58631580, E-mail: qiqi20011983@gmail.com, lead contact author  
21  
22  
23  
24  
25  
26

## 27 **TRANSPARENT METHOD**

### 28 **General procedure**

29 All the strains used in this study were summarized in Supplementary Table S3.  
30 Molecular cloning and manipulation of plasmids were done with *E. coli* DH5 $\alpha$ . All the  
31 plasmids and oligonucleotides used in this work were listed in Supplementary Table S4 and  
32 Table S5.

### 33 **Construction of heme biosensor**

34 To construct a related plasmid that characterizes HrtR function, the *hrtR* and *gfp* genes  
35 were generated by PCR with primers *hrtR*-F/*hrtR*-R, *gfp*-F/*gfp*-R, respectively.  
36 Chloramphenicol resistance gene and p15A ori were cloned with primers p15A-F/p15A-R  
37 using plasmid pACYC184 as the template. Then the three fragments were assembled together  
38 using the Gibson method(Gibson et al., 2009) to obtain the plasmid P1. To construct plasmids  
39 P0, P2, P3 and P4, the resulting fragments were transformed into *E. coli* DH5 $\alpha$  after the  
40 treatment by T4 PNK and T4 ligase, which generated by primers p0-F/p0-R, p2-F/p2-R, p3-  
41 F/p3-R, p4-F/p3-R were performed, respectively.

### 42 **Construction and characterization of HrtR saturation mutant library**

43 All HrtR mutants were obtained by using plasmid P1 as template, the primers used for  
44 the mutation are listed in Supplementary Table S5. Phanta Max Super-Fidelity DNA  
45 Polymerase P505 (Vazyme Biotech Co.,Ltd) was used in all PCR reactions. Resulting  
46 fragment was assembled using the Gibson method. The obtained plasmids were transferred  
47 into DH5 $\alpha$ , respectively, and the obtained strain was cultured in a 24-well plate. After 24  
48 hours of culture, the green fluorescence intensity was detected by a microplate reader. (GFP:  
49 exciting light: 485nm, emission light: 528nm).

### 50 **Construction and optimization of the regulatory system**

51 The strain that regulation *mkate2* contains plasmids PDMGn (n=1, 2, 3, 4, 5) and PSX  
52 (X=A,B,O). For pDMG1 construction, chloramphenicol resistance gene and p15A ori were  
53 amplified with primers ori-F/ori-R-1. Promoter BBa-J23113 of *dcas9* was included in the  
54 primer ori-R-1. *dcas9* and *mkate2* gene were cloned with primers *dcas9*-F/*dcas9*-R and

55 mkate-F/mkate-R, degradation tags AAV (AANDENYAAAV) and LAA (AANDENYALAA)  
56 are added to the corresponding primers, respectively. Fragments containing different  
57 promoters were fused by overlap PCR with primer mkate-F2 and ori-R-1. Resulting fragment  
58 was assembled using the Gibson method. Similarly, promoters BBa-J23117, Ba-J23114, Ba-  
59 J23110 and Ba-J23100 were contained in primers ori-R-2, ori-R-3, ori-R-4 and ori-R-5,  
60 respectively. The construction method of pDMG2, pDMG3, pDMG4 and pDMG5 were the  
61 same as above. The construction method of pDMG0 is the same as that of P0, using pDMG4  
62 as a template and primers pair pdmg0-F/pdmg0-R. PDMG4 was cloned as a template using  
63 primers M1-F and M1-R, M2-F and M2-R, M2-F and M3-R, resulting fragment were  
64 transformed into *E. coli* DH5 $\alpha$  after the treatment by T4 PNK and T4 ligase to obtain the  
65 plasmid pDMG4-1, pDMG4-2 and pDMG4-3.

66 For pSA and pSB construction, sgRNA-A and sgRNA-B were cloned with primer pairs  
67 sgrna-a-F/sgrna-R, sgrna-b-F/sgrna-R, respectively. *hrtR* was amplified using primer sensor-F  
68 and sensor-R. then *hrtR* and Different sgRNAs were assembled using the Gibson method with  
69 the plasmid puc19 digested with *Bam*HI. The construction method of pSO is the same as that  
70 of P0, using pSIB as a template and psio-F/psio-R as primers.

71 Plasmids PBHn (n=1, 2, 3) was constructed by adding sgRNA targeting *hemB* to PSB.  
72 Different sgRNAs targeting *hemB* were amplified using primers sg-1-F/sg-1-R, sg-2-F/sg-2-R,  
73 sg-3-F/sg-3-R, respectively. pSB cloned with primers site-F/site-R was used as the backbone.  
74 SgRNA-1, sgRNA-2 and sgRNA-3 were assembled using the Gibson method with the  
75 backbone, respectively. At the same time, we replaced the backbone with pSO based on  
76 pBH2 to obtain the plasmid pOH2. Remove the *hrtO* from the primer sg-2-F and use it to  
77 amplify with sg-1-R, resulting fragment was assembled using the Gibson method with the  
78 backbone pSB to obtain the plasmid pOBH2.

79 The obtained plasmids were transferred into DH5 $\alpha$ , respectively, the specific conditions  
80 of the plasmid contained in the strain refer to Supplementary Table S3, And the obtained  
81 strain was cultured in a 24-well plate and the red fluorescence intensity was detected in real  
82 time using a microplate reader (mKATE: exciting light: 590nm, emission light: 645nm).

### 83 **Construction of ALA, PBG and Porphyrin biosynthesis system**

84 The gene *hemA* from *Salmonella Arizona* and *hemL* from *E. coli* was cloned with  
85 primers AL-F/AL-R using pDAL as a template. The plasmid pSB, pSBH2 and pOSBH2 were  
86 amplified using primers 10B-gj-F/10B-gj-R, respectively. After digestion with *XhoI* and *NotI*,  
87 *hemA-hemL* were cloned into the above linearized plasmids cut with *XhoI* and *NotI* to obtain  
88 the plasmid pSBAL, pBH2AL and pOBH2AL. For pBH2ALT construction, *gltW* was cloned  
89 with primers tRNA-F/tRNA-R, the backbone was amplified with primers tRNA-gj-F/tRNA-  
90 gj-R using pBH2AL as a template. The two fragments were assembled using the Gibson  
91 method. The *gdhA* gene in *E. coli* was cloned and integrated into the PCLA plasmid by  
92 Gibson method to construct the PCLAG plasmid.

93 The pCAL and PHAL were cloned with primers CAL-F/CAL-R and HAL-F/HAL-R  
94 using pSBAL and as a template, resulting fragment were transformed into *E. coli* DH5 $\alpha$  after  
95 the treatment by T4 PNK and T4 ligase. pOCAL and POHAL were obtained using the same  
96 method, using pCAL and pHAL as a template and CO-F/CO-R and HO-F/ HO-R as primers.  
97 The obtained plasmids were transferred into DH5 $\alpha$ , respectively, the specific conditions of the  
98 plasmid contained in the strain refer to Supplementary Table S3. The medium composition  
99 and culture conditions used in the fermentation process were the same as the previous report.  
100 ALA and PBG concentration were analyzed using modified Ehrlich's reagent(Kang et al.,  
101 2011). Porphyrin compounds were detected by HPLC.

### 102 **Quantitative real-time PCR (RT-PCR)**

103 The primers studied in this work were listed in Supplementary Table S5. The message  
104 RNA (mRNA) level was measured by RT-PCR. The Sample for extracting mRNA were  
105 harvested and frozen immediately at -80 °C. mRNA of *hemB* and *dcas9* was extracted using  
106 the RNeasy Mini Kit (Tiangen). The cDNA was obtained from reverse transcription and RT-  
107 PCR was carried out in a 96-well plate with a total reaction volume of 20  $\mu$ L per well in  
108 QuantStudioTM3 (Thermo Fisher) using an SYBR® Premix Ex Taq™ II (Perfect Real Time),  
109 according to manufacturer's specifications (TaKaRa).

### 110 **Analysis of heme**

111 The cells were cultured in LB medium, and 1 ml was sampled every 6 hours. The  
112 obtained sample was disrupted by Automatic sample grinder (Jingxin, Shanghai), and the  
113 supernatant was taken after centrifugation. Intracellular heme concentration was determined  
114 using Heme Colorimetric Assay Kit (BioVision, USA).

#### 115 **Dose response curve**

116 Mutants were cultured in LB medium supplemented with 0.05 $\mu$ M, 0.1 $\mu$ M, 0.25 $\mu$ M,  
117 0.5 $\mu$ M, 1 $\mu$ M, 2.5 $\mu$ M, 5 $\mu$ M, 10 $\mu$ M and 20 $\mu$ M heme respectively. Cells were cultured in a 96-  
118 well plate and the fluorescence intensity was measured at 8h. GraphPad was used to draw the  
119 dose response curve and calculate various parameters.

#### 120 **Heme titration**

121 Purification of HrtR and heme titration experiments referred to the methods of Sawai et  
122 al (Sawai et al., 2012).

#### 123 **Molecular dynamics**

124 The molecular dynamics(Mazumder and Case) simulations were performed on the heme  
125 bound HrtR/mutant dimers (PDB ID: 3VP5)(Sawai et al., 2012) by using the AMBER 12  
126 software(Case et al., 2005). The FF14SB force field(Maier et al., 2015) was applied for the  
127 HrtR proteins. The point charges of heme were calculated with antechamber<sup>4</sup> based on the  
128 restricted electrostatic potential (RESP) procedure(Bayly et al., 1993). Bonded terms at the Fe  
129 center were calculated according to Seminario's method based on  
130 second - derivatives(Seminario, 1996; Villarino et al., 2018), the GAFF force field(Wang et  
131 al., 2004) was adopted for the remaining atoms of heme. The binding complexes were  
132 individually immersed into the center of a truncated octahedron box of TIP3P water  
133 molecules with a margin distance of 10.0 Å, Na<sup>+</sup> counterions were added with the AMBER  
134 XLEAP module to keep system in electric neutrality(Case et al., 2005). Each system was  
135 firstly energy minimized using the steepest descent method for 5000 steps with the binding  
136 complex restricted by a harmonic constraint of 100 kcal mol<sup>-1</sup>Å<sup>-2</sup>. A further conjugate  
137 gradient minimization of 5000 steps was performed with no constraint. Then the system was  
138 gradually heated from 0 K to 300 K under the NVT ensemble over a period of 1 ns, during

139 which the Langevin thermostat with a coupling coefficient of 1.0 ps and a weak constraint of  
 140  $10 \text{ kcal mol}^{-1} \text{ \AA}^{-2}$  on the binding complex was applied. Each model was subjected to an  
 141 equilibrium simulation for 1 ns with no constraint and then a 20 ns production MD simulation  
 142 under NPT ensemble. Periodic boundary conditions were applied. System temperature was  
 143 kept 300 K using the Berendsen thermostat with a time constant of 1 ps. Isotropic constant  
 144 pressure was maintained using Berendsen pressure coupling algorithm with a time constant of  
 145 1 ps. Hydrogens involved in covalent bonds were constrained by the SHAKE  
 146 algorithm(Ryckaert J P 1976). The long-range electrostatic interactions were treated by the  
 147 Particle Mesh Ewald (PME) method(Essmann et al., 1995). The cutoffs for long-range  
 148 electrostatic and Van der Waals interactions were both set to 10.0 Å. The time step was set to  
 149 2 fs, the coordinates were saved every 1 ps to record the MD trajectory.

## 150 **Binding free energy**

151 By neglecting the coordinate bonding interactions between HrtR and heme, their  
 152 intermolecular binding free energy ( $\Delta G_{\text{bind}}$ ) was calculated using the molecular mechanics  
 153 combined with generalized Born and surface area solvation (MM/GBSA) approach(Kollman  
 154 et al., 2000):

$$155 \quad \Delta G_{\text{bind}} = G_{\text{complex}} - (G_{\text{G4}} + G_{\text{APC}}) \quad (1)$$

$$156 \quad \Delta G_{\text{bind}} = \Delta H - T\Delta S \approx \Delta E_{\text{MM}} + \Delta G_{\text{solv}} - T\Delta S \quad (2)$$

$$157 \quad \Delta E_{\text{MM}} = \Delta E_{\text{int}} + \Delta E_{\text{vdW}} + \Delta E_{\text{ele}} \quad (3)$$

$$158 \quad \Delta G_{\text{solv}} = \Delta G_{\text{GB}} + \Delta G_{\text{SA}} \quad (4)$$

159 Where  $E_{\text{MM}}$  is the gas phase interaction energy comprising internal strain energy ( $E_{\text{int}}$ ),  
 160 van der Waals energy ( $E_{\text{vdW}}$ ) and electrostatic energy ( $E_{\text{ele}}$ ).  $G_{\text{solv}}$  is the solvation free energy  
 161 comprising contributions from a polar part ( $G_{\text{GB}}$ ) and a nonpolar part (Taverna et al.).  $\Delta E_{\text{int}}$   
 162 can be neglected in the current system.  $\Delta G_{\text{GB}}$  was estimated using the generalized Born model  
 163 with the interior and exterior dielectric constants set to 4 and 80, respectively.  $\Delta G_{\text{SA}}$  was  
 164 estimated using the LCPO algorithm(Weiser et al., 1999):  $\Delta G_{\text{SA}} = \gamma\Delta\text{SASA} + \beta$ , where  $\gamma$  and  
 165  $\beta$  were set to 0.0072 and 0, respectively. By performing the normal mode analysis (NMA),  
 166  $T\Delta S$  that represents the entropy contribution was estimated using the NMODE module.  
 167 Snapshots were extracted from the last 5 ns trajectories with an interval of 25 ps for the  
 168 calculations of  $\Delta E_{\text{vdW}}$ ,  $\Delta E_{\text{ele}}$ ,  $\Delta G_{\text{GB}}$  and  $\Delta G_{\text{SA}}$ . While for the calculation of entropy, only 50  
 169 snapshots was evenly extracted from the last 5 ns trajectories due to the expensive  
 170 computational cost of NMA(Liu et al., 2018).

171 **Supplementary Figures**

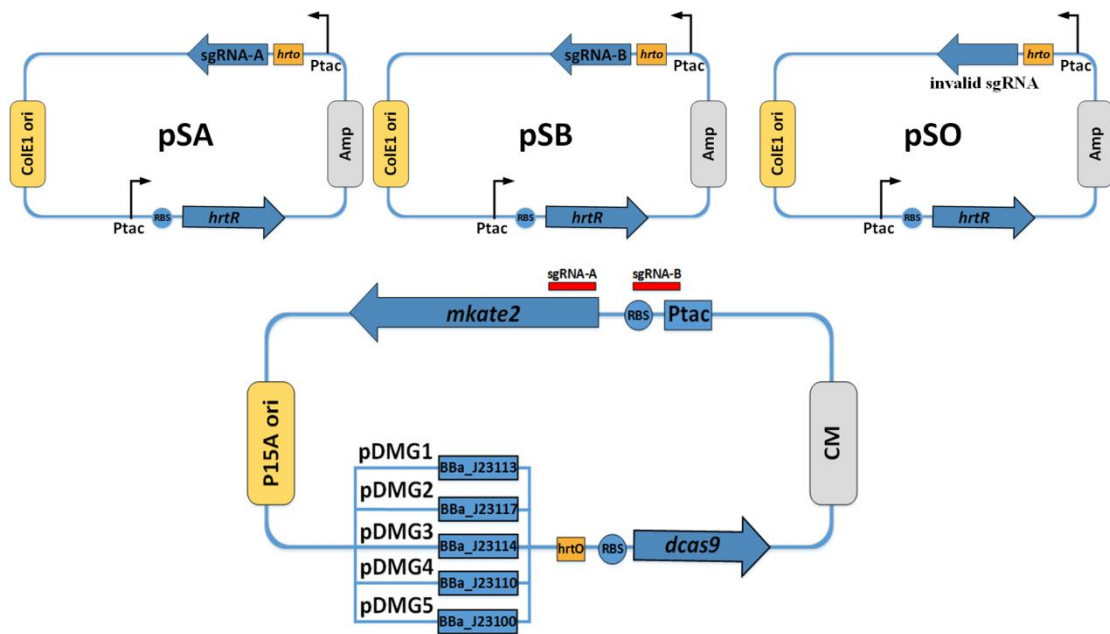

172

173 Figure S1: sgRNA-A acts at the 5' end 24bp-44bp of *mkate2*; sgRNA-B acts at the middle of  
 174 promoter and RBS of *mkate2*; sgRNA-C does not contain a spacer site. [Related to Figure 5](#)

175

176

177

178

179

180

181

182

183

184

185

186

187

188

189



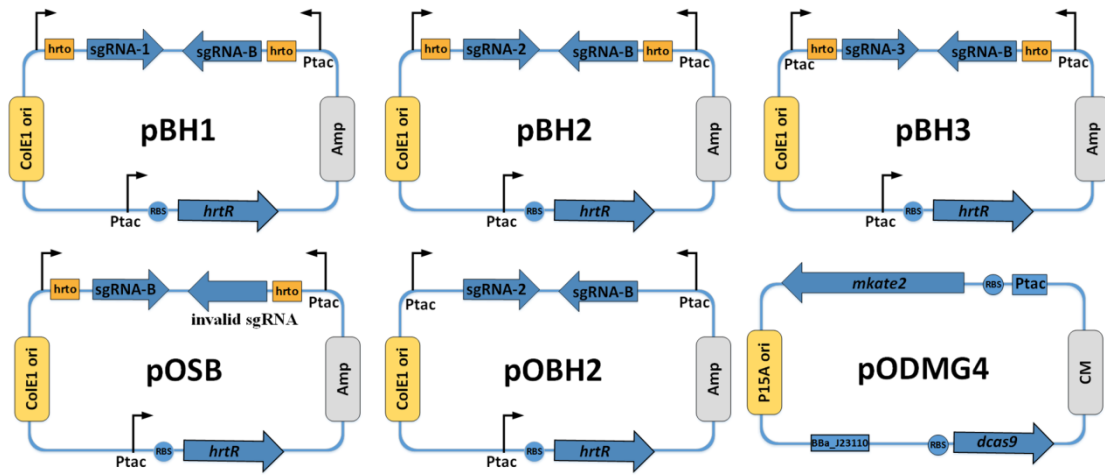

190

191 Figure S2: The schematic diagram of plasmids pBH<sub>n</sub> (n=1,2,3), pOSB, pOBH2, pODMG4.

192 [Related to Figure 6](#)

193

194

195

196

197

198

199

200

201

202

203

204

205

206

207

208

209

210

211

212

213

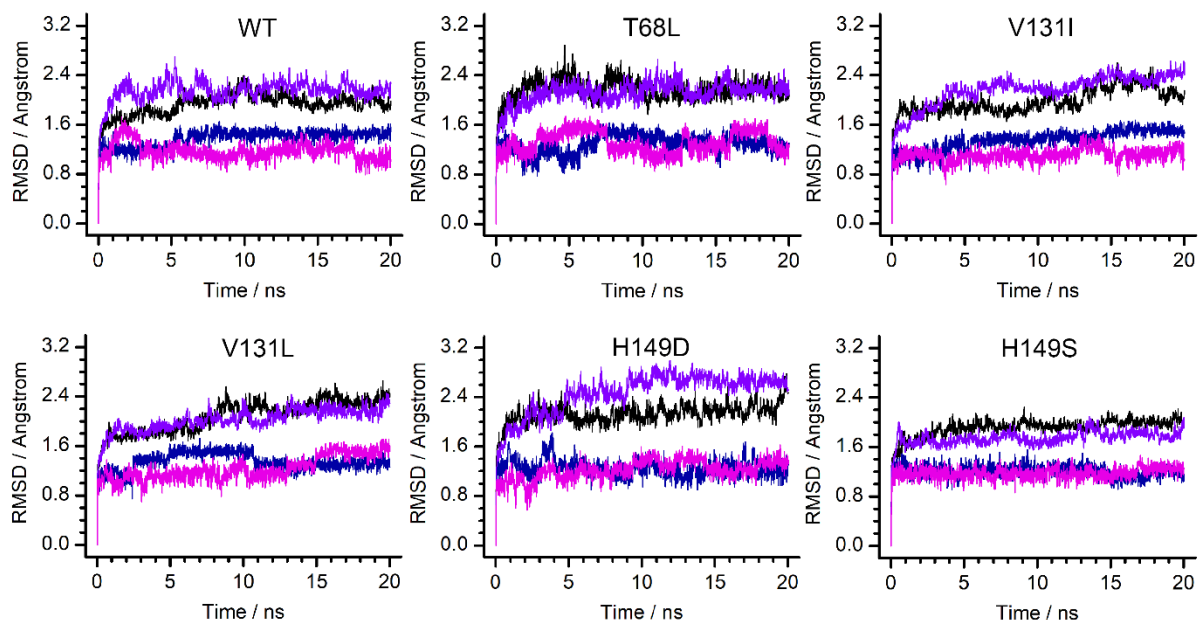

214

215 Figure S3,. The root-mean-square deviations (RMSDs) of the HrtR dimer during molecular  
 216 dynamics. The RMSDs are colored in black and purple for the HrtR proteins in chain A and  
 217 chain B, respectively. The RMSDs of the heme molecules that bind to the chain A and chain  
 218 B are colored in navy blue and magenta, respectively. [Related to Figure 3](#)

219

220

221

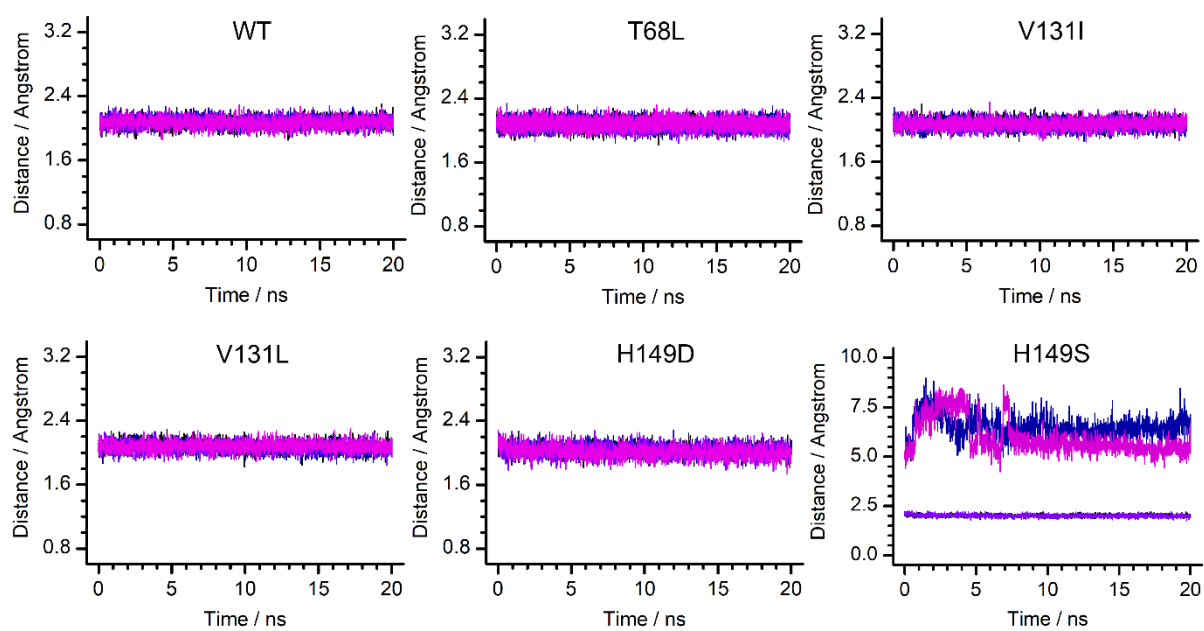

222

223 Figure S4. The distances between the heme Fe atom and the HrtR residues. The distance  
224 curves between heme Fe atom and NE2 atoms of H72 from chain A and chain B are colored  
225 in black and purple, respectively. The distance curves between heme Fe atom and  
226 NE2/OD1/OG atoms of H149/D149/S149 from chain A and chain B are colored in navy blue  
227 and magenta, respectively. [Related to Figure 3](#)

228

229

230

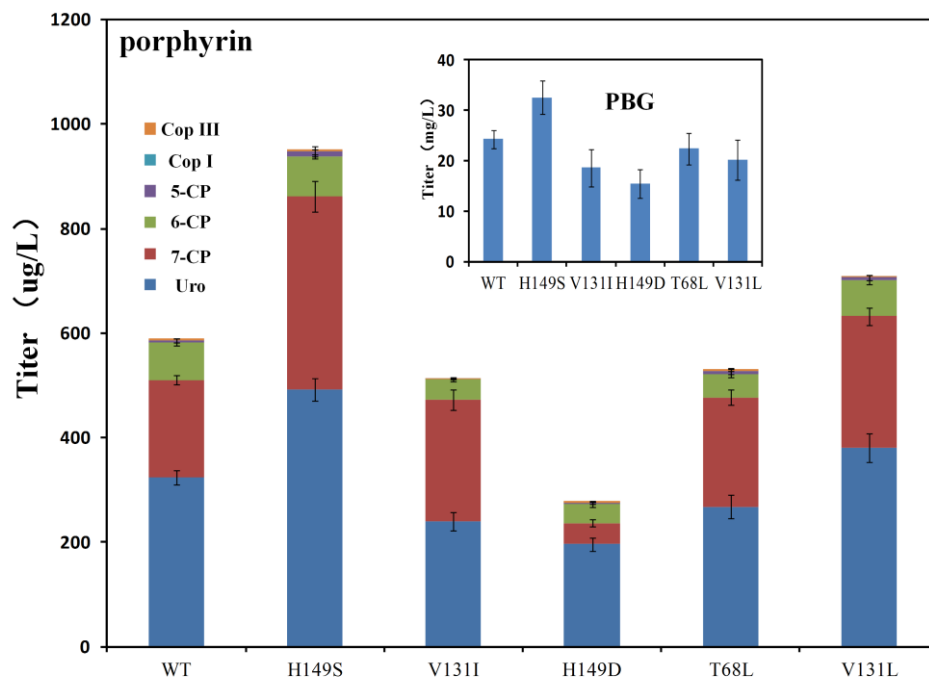

231

232 Figure S5. Accumulation of porphyrins and PBG in different mutant during ALA production;

233 Error bars represent  $\pm 1$  SD from the mean of three replicate cultures. [Related to Figure 7](#)

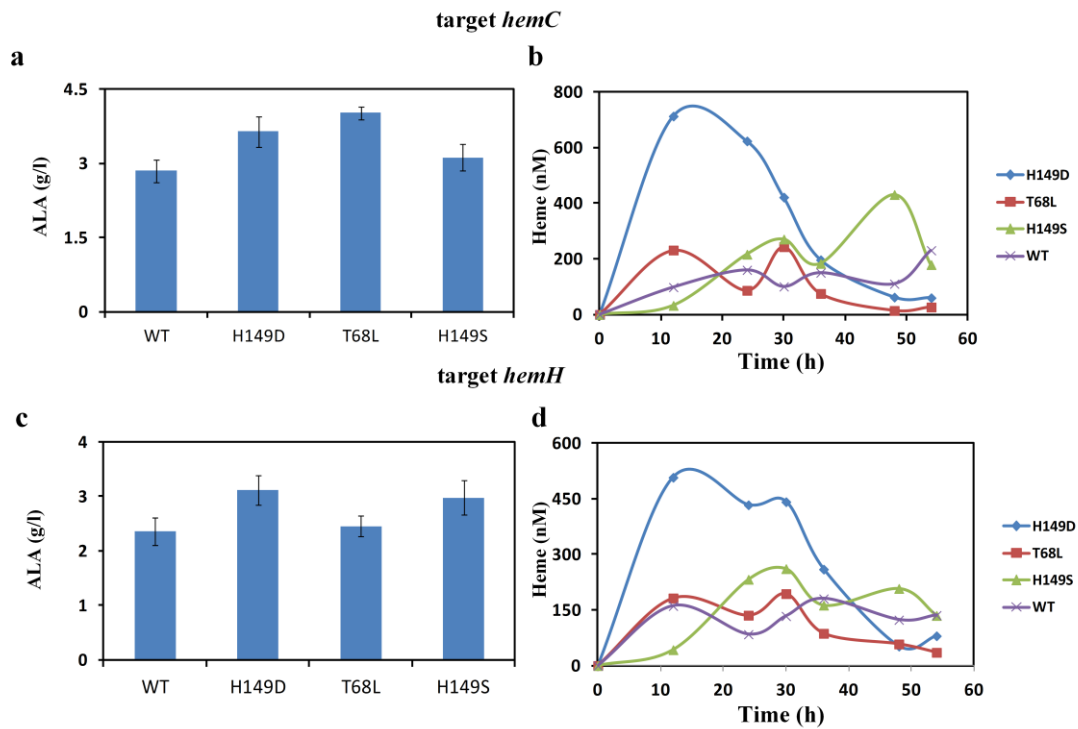

234

235 Figure S6. a: Accumulation of ALA in different mutants during PBG production; b:  
 236 Intracellular free heme concentration curve of the strain target *hemC*; c: Accumulation of  
 237 ALA in different mutants during porphyrins production; b: Intracellular free heme  
 238 concentration curve of the strain target *hemH*. Error bars represent  $\pm 1$  SD from the mean of  
 239 three replicate cultures. [Related to Figure 8](#)

240

241

242

243

244

245

246

247

248

249

250 **Supplementary Tables**

251 Table S1. Fluorescence intensity of GFP under the control of different mutants. [Related to](#)

252 [Figure 2](#)

|               | <b>N</b> | <b>K</b> | <b>T</b> | <b>S</b> | <b>R</b> | <b>I</b> | <b>M</b> | <b>H</b> | <b>Q</b> | <b>P</b> |
|---------------|----------|----------|----------|----------|----------|----------|----------|----------|----------|----------|
| <b>Thr68</b>  | 27719    | 32044    | 13628    | 27379    | 27528    | 12095    | 22640    | 30604    | 24327    | 38225    |
| <b>Val131</b> | 4518     | 5690     | 6159     | 7516     | 7545     | 5576     | 6671     | 7692     | 7153     | 7427     |
| <b>His149</b> | 5081     | 5930     | 6374     | 30161    | 6607     | 6347     | 7628     | 13628    | 5281     | 30290    |
|               |          |          |          |          |          |          |          |          |          |          |
|               | <b>L</b> | <b>D</b> | <b>E</b> | <b>A</b> | <b>G</b> | <b>V</b> | <b>Y</b> | <b>C</b> | <b>W</b> | <b>F</b> |
| <b>Thr68</b>  | 6937     | 36889    | 35757    | 25694    | 22389    | 19316    | 27781    | 12065    | 35333    | 10994    |
| <b>Val131</b> | 14183    | 5788     | 5395     | 9991     | 5741     | 13628    | 9273     | 6463     | 10936    | 11663    |
| <b>His149</b> | 6209     | 4442     | 4413     | 6345     | 6021     | 7540     | 7130     | 7028     | 7685     | 6582     |

253

254

255

256

257

258

259

260

261

262

263

264

265

266

267

268 Table S2. Binding free energies between HrtR and heme<sup>a</sup>. [Related to Figure 3](#)

| P450  | Energy components <sup>b</sup> |                         |                        |                        |            |              |                          |
|-------|--------------------------------|-------------------------|------------------------|------------------------|------------|--------------|--------------------------|
|       | $\Delta E_{\text{ele}}$        | $\Delta E_{\text{vdW}}$ | $\Delta G_{\text{GB}}$ | $\Delta G_{\text{SA}}$ | $\Delta H$ | $-T\Delta S$ | $\Delta G_{\text{bind}}$ |
| WT    | 190.59                         | 1.69                    | -155.66                | -9.12                  | 27.49      | 30.09        | 57.58                    |
| T68L  | 177.64                         | 14.27                   | -147.91                | -8.81                  | 35.19      | 30.66        | 65.85                    |
| V131I | 223.01                         | 6.14                    | -188.54                | -8.89                  | 31.72      | 34.88        | 66.60                    |
| V131L | 138.60                         | 12.36                   | -111.28                | -9.08                  | 30.60      | 29.25        | 59.85                    |
| H149D | 297.42                         | 18.55                   | -262.79                | -8.79                  | 44.39      | 35.10        | 79.49                    |
| H149S | 135.06                         | -49.53                  | -118.95                | -9.37                  | -42.78     | 32.90        | -9.88                    |

269 <sup>a</sup>The binding free energies were calculated by neglecting the coordinate bonding interactions between  
 270 HrtR and heme since the molecular dynamics method is unproper to compute the intermolecular  
 271 binding affinity with covalent bond involved. Therefore, the values of  $\Delta G_{\text{bind}}$  presented here represent  
 272 the binding susceptibility of heme to the HrtR variants instead of absolute binding free energies.

273 <sup>b</sup>Energies are in kcal·mol<sup>-1</sup>.

274

275

276

277

278

279

280

281

282

283

284

285

286

287

288

289

290

291

292 Table S3. Bacterial strains used in this study. [Related to Figure 1,2,3,5,6,7 and 8.](#)

| Strains   | Relevant properties                                            | Source     |
|-----------|----------------------------------------------------------------|------------|
| DH5α      |                                                                | lab stock  |
| S1        | MG1655 integrates a copies of <i>hemA/hemL</i> on the genome   | lab stock  |
| S20       | MG1655 integrates 20 copies of <i>hemA/hemL</i> on the genome  | lab stock  |
| S35       | MG1655 integrates 35 copies of <i>hemA/hemL</i> on the genome  | lab stock  |
| S65       | MG1655 integrates 65 copies of <i>hemA/hemL</i> on the genome  | lab stock  |
| S100      | MG1655 integrates 100 copies of <i>hemA/hemL</i> on the genome | lab stock  |
| S1P1      | S1 harboring P1                                                | this study |
| S20P1     | S20 harboring P1                                               | this study |
| S35P1     | S35 harboring P1                                               | this study |
| S65P1     | S65 harboring P1                                               | this study |
| S100P1    | S100 harboring P1                                              | this study |
| SP0       | DH5α harboring P0                                              | this study |
| SP1       | DH5α harboring P2                                              | this study |
| SP2       | DH5α harboring P3                                              | this study |
| SP3       | DH5α harboring P4                                              | this study |
| SP4       | DH5α harboring P5                                              | this study |
| SP1-T68L  | DH5α harboring P1-T68L                                         | this study |
| SP1-V131L | DH5α harboring P1-V131L                                        | this study |
| SP1-V131I | DH5α harboring P1-V131I                                        | this study |
| SP1-H149D | DH5α harboring P1-H149D                                        | this study |
| SP1-H149S | DH5α harboring P1-H149S                                        | this study |
| SO1       | DH5α harboring PSO+PDMG1                                       | this study |
| SO2       | DH5α harboring PSO+PDMG2                                       | this study |
| SO3       | DH5α harboring PSO+PDMG3                                       | this study |
| SO4       | DH5α harboring PSO+PDMG4                                       | this study |
| SO5       | DH5α harboring PSO+PDMG5                                       | this study |
| SA1       | DH5α harboring PSA+PDMG1                                       | this study |
| SA2       | DH5α harboring PSA+PDMG2                                       | this study |
| SA3       | DH5α harboring PSA+PDMG3                                       | this study |
| SA4       | DH5α harboring PSA+PDMG4                                       | this study |
| SA5       | DH5α harboring PSA+PDMG5                                       | this study |
| SB1       | DH5α harboring PSB+PDMG1                                       | this study |
| SB2       | DH5α harboring PSB+PDMG2                                       | this study |
| SB3       | DH5α harboring PSB+PDMG3                                       | this study |
| SB4       | DH5α harboring PSB+PDMG4                                       | this study |
| SB5       | DH5α harboring PSB+PDMG5                                       | this study |
| SH0       | DH5α harboring PDMG4+POSB                                      | this study |
| SH1       | DH5α harboring PDMG4+PBH1                                      | this study |
| SH2       | DH5α harboring PDMG4+PBH2                                      | this study |
| SH3       | DH5α harboring PDMG4+PBH3                                      | this study |
| SOH       | DH5α harboring PODMG4+POBH2                                    | this study |
| SH2-AL-1  | DH5α harboring PBH2-AL+PDMG4-1                                 | this study |
| SH2-AL-2  | DH5α harboring PBH2-AL+PDMG4-2                                 | this study |
| SH2-AL-3  | DH5α harboring PBH2-AL+PDMG4-3                                 | this study |
| SOH-AL    | DH5α harboring PODMG4+POBH2-AL                                 | this study |
| SB4-AL    | DH5α harboring PSB-AL+PDMG4                                    | this study |



|             |                                             |            |
|-------------|---------------------------------------------|------------|
| SH2-AL      | DH5 $\alpha$ harboring PDMG4+PBH2-AL        | this study |
| SH2-ALT     | DH5 $\alpha$ harboring PDMG4+PBH2ALT        | this study |
| SH2-ALTG    | DH5 $\alpha$ harboring PDMG4+PBH2ALTG       | this study |
| ST-T68L     | DH5 $\alpha$ harboring PDMG4+PBH2ALTG-T68L  | this study |
| ST-V131L    | DH5 $\alpha$ harboring PDMG4+PBH2ALTG-V131L | this study |
| ST-V131I    | DH5 $\alpha$ harboring PDMG4+PBH2ALTG-V131I | this study |
| ST-H149D    | DH5 $\alpha$ harboring PDMG4+PBH2ALTG-H149D | this study |
| ST-H149S    | DH5 $\alpha$ harboring PDMG4+PBH2ALTG-H149S | this study |
| SAL-C       | DH5 $\alpha$ harboring PDMG4+PCAL           | this study |
| SAL-CO      | DH5 $\alpha$ harboring PDMG4+POCAL          | this study |
| SAL-C-H149D | DH5 $\alpha$ harboring PDMG4+PCAL-H149D     | this study |
| SAL-C-H149S | DH5 $\alpha$ harboring PDMG4+PCAL-H149S     | this study |
| SAL-C-T68L  | DH5 $\alpha$ harboring PDMG4+PCAL-T68L      | this study |
| SAL-H       | DH5 $\alpha$ harboring PDMG4+PHAL           | this study |
| SAL-HO      | DH5 $\alpha$ harboring PDMG4+POHAL          | this study |
| SAL-H-H149D | DH5 $\alpha$ harboring PDMG4+PHAL-H149D     | this study |
| SAL-H-H149S | DH5 $\alpha$ harboring PDMG4+PHAL-H149S     | this study |
| SAL-H-T68L  | DH5 $\alpha$ harboring PDMG4+PHAL-T68L      | this study |

293  
294  
295  
296  
297  
298  
299  
300  
301  
302  
303  
304  
305  
306  
307  
308  
309  
310

311 Table S4. Plasmids used in this study. [Related to Figure 1,2,3,5,6,7 and 8.](#)

| Plasmids       | Charecteristics                                                                 | Source     |
|----------------|---------------------------------------------------------------------------------|------------|
| P0             | pACYC184 contains <i>gfp</i> and <i>HrtR</i>                                    | this study |
| P1             | pACYC184 contains <i>HrtO</i> , <i>gfp</i> and <i>HrtR</i>                      | this study |
| P1-T68L        | pACYC184 contains <i>gfp</i> and <i>HrtR</i> -T68L                              | this study |
| P1-V131L       | pACYC184 contains <i>gfp</i> and <i>HrtR</i> -V131L                             | this study |
| P1-V131I       | pACYC184 contains <i>gfp</i> and <i>HrtR</i> -V131I                             | this study |
| P1-H149D       | pACYC184 contains <i>gfp</i> and <i>HrtR</i> -H149D                             | this study |
| P1-H149S       | pACYC184 contains <i>gfp</i> and <i>HrtR</i> -H149S                             | this study |
| PSO            | pUC19 contains <i>HrtR</i> and <i>HrtO</i> -ineffective <i>sgRNA</i>            | this study |
| PSA            | pUC19 contains <i>HrtR</i> and <i>HrtO</i> - <i>sgRNA</i> -A                    | this study |
| PSB            | pUC19 contains <i>HrtR</i> and <i>HrtO</i> - <i>sgRNA</i> -B                    | this study |
| POSB           | pUC19 contains <i>HrtR</i> and <i>sgRNA</i> -B                                  | this study |
| PDMG1          | pACYC184 contains <i>mkate2</i> and <i>dcas9</i> (promoter: <sub>J23113</sub> ) | this study |
| PDMG2          | pACYC184 contains <i>mkate2</i> and <i>dcas9</i> (promoter: <sub>J23117</sub> ) | this study |
| PDMG3          | pACYC184 contains <i>mkate2</i> and <i>dcas9</i> (promoter: <sub>J23114</sub> ) | this study |
| PDMG4          | pACYC184 contains <i>mkate2</i> and <i>dcas9</i> (promoter: <sub>J23110</sub> ) | this study |
| PDMG5          | pACYC184 contains <i>mkate2</i> and <i>dcas9</i> (promoter: <sub>J23100</sub> ) | this study |
| PODMG4         | PDMG4 deletes <i>HrtO</i>                                                       | this study |
| PBH1           | pSIB contains <i>sgRNA</i> -1                                                   | this study |
| PBH2           | pSIB contains <i>sgRNA</i> -2                                                   | this study |
| PBH3           | pSIB contains <i>sgRNA</i> -3                                                   | this study |
| POBH2          | pSIBH2 with the deletion of <i>HrtO</i>                                         | this study |
| PDMG4-1        | The promoter of <i>mkate2</i> in PDMG4 was replaced with J23110                 | this study |
| PDMG4-2        | The promoter of <i>mkate2</i> in PDMG4 was replaced with J23101                 | this study |
| PDMG4-3        | The promoter of <i>mkate2</i> in PDMG4 was replaced with J23106                 | this study |
| POBH2-AL       | POBH2 added <i>hemA/hemL</i>                                                    | this study |
| PSB-AL         | PSB added <i>hemA/hemL</i>                                                      | this study |
| PBH2-AL        | PBH2 added <i>hemA/hemL</i>                                                     | this study |
| PBH2ALT        | PBH2AL added <i>tRNA</i> -GLU                                                   | this study |
| PBH2ALTG       | PBH2ALT added <i>rhtA</i> and <i>gdhA</i>                                       | this study |
| PBH2ALTG-T68L  | PBH2ALTG with <i>HrtR</i> -T68L                                                 | this study |
| PBH2ALTG-V131L | PBH2ALTG with <i>HrtR</i> -V131L                                                | this study |
| PBH2ALTG-V131I | PBH2ALTG with <i>HrtR</i> -V131I                                                | this study |
| PBH2ALTG-H149D | PBH2ALTG with <i>HrtR</i> -H149D                                                | this study |
| PBH2ALTG-H149S | PBH2ALTG with <i>HrtR</i> -H149S                                                | this study |
| PCAL           | replace with <i>sgRNA</i> targeting <i>hemC</i> on the basis of PBH2ALT         | this study |
| POCAL          | PCAL with the deletion of <i>HrtO</i>                                           | this study |
| PCAL-H149D     | PCAL with <i>HrtR</i> -H149D                                                    | this study |
| PCAL-H149S     | PCAL with <i>HrtR</i> -H149S                                                    | this study |
| PCAL-T68L      | PCAL with <i>HrtR</i> -T68L                                                     | this study |
| PHAL           | replace with <i>sgRNA</i> targeting <i>hemH</i> on the basis of PBH2ALT         | this study |
| POHAL          | PHAL with the deletion of <i>HrtO</i>                                           | this study |

---

|                   |                                        |                   |
|-------------------|----------------------------------------|-------------------|
| <b>PHAL-H149D</b> | <b>PHAL with HrtR-H149D</b>            | <b>this study</b> |
| <b>PHAL-H149S</b> | <b>PHAL with HrtR-H149S</b>            | <b>this study</b> |
| <b>PHAL-T68L</b>  | <b>PHAL with HrtR-T68L</b>             | <b>this study</b> |
| <b>PCHUA</b>      | <b>pcolAduet1 contains <i>chuA</i></b> | <b>this study</b> |
| <b>p15b-WT</b>    | <b>p15b contains HrtR-WT</b>           | <b>this study</b> |
| <b>p15b-H149D</b> | <b>p15b contains HrtR-H149D</b>        | <b>this study</b> |
| <b>p15b-H149S</b> | <b>p15b contains HrtR-H149S</b>        | <b>this study</b> |
| <b>p15b-T68L</b>  | <b>p15b contains HrtR-T68L</b>         | <b>this study</b> |
| <b>p15b-V131L</b> | <b>p15b contains HrtR-V131L</b>        | <b>this study</b> |
| <b>p15b-V131I</b> | <b>p15b contains HrtR-V131I</b>        | <b>this study</b> |

---

312

313

314

315

316

317

318

319

320

321

322

323

324

325

326

327

328

329

330

331

332

333

334 **References**  
335

- 336 Bayly, C.I., Cieplak, P., Cornell, W.D., and Kollman, P.A. (1993). A Well-Behaved  
337 Electrostatic Potential Based Method Using Charge Restraints for Deriving Atomic  
338 Charges - the Resp Model. *J Phys Chem-Us* *97*, 10269-10280.
- 339 Case, D.A., Cheatham, T.E., Darden, T., Gohlke, H., Luo, R., Merz, K.M., Onufriev, A.,  
340 Simmerling, C., Wang, B., and Woods, R.J. (2005). The Amber biomolecular  
341 simulation programs. *J Comput Chem* *26*, 1668-1688.
- 342 Essmann, U., Perera, L., Berkowitz, M.L., Darden, T., Lee, H., and Pedersen, L.G.  
343 (1995). A Smooth Particle Mesh Ewald Method. *J Chem Phys* *103*, 8577-8593.
- 344 Gibson, D.G., Young, L., Chuang, R.Y., Venter, J.C., Hutchison, C.A., and Smith, H.O.  
345 (2009). Enzymatic assembly of DNA molecules up to several hundred kilobases. *Nat*  
346 *Methods* *6*, 343-U341.
- 347 Kang, Z., Wang, Y., Gu, P.F., Wang, Q., and Qi, Q.S. (2011). Engineering Escherichia  
348 coli for efficient production of 5-aminolevulinic acid from glucose. *Metab Eng* *13*,  
349 492-498.
- 350 Kollman, P.A., Massova, I., Reyes, C., Kuhn, B., Huo, S.H., Chong, L., Lee, M., Lee,  
351 T., Duan, Y., Wang, W., *et al.* (2000). Calculating structures and free energies of  
352 complex molecules: Combining molecular mechanics and continuum models.  
353 *Accounts of chemical research* *33*, 889-897.
- 354 Liu, N., Zhou, W.F., Guo, Y., Wang, J.M., Fu, W.T., Sun, H.Y., Liu, D., Duan, M.J.,  
355 and Hou, T.J. (2018). Molecular Dynamics Simulations Revealed the Regulation of  
356 Ligands to the Interactions between Androgen Receptor and Its Coactivator. *J Chem*  
357 *Inf Model* *58*, 1652-1661.
- 358 Maier, J.A., Martinez, C., Kasavajhala, K., Wickstrom, L., Hauser, K.E., and  
359 Simmerling, C. (2015). ff14SB: Improving the Accuracy of Protein Side Chain and  
360 Backbone Parameters from ff99SB. *Journal of chemical theory and computation* *11*,  
361 3696-3713.
- 362 Mazumder, D., and Case, D.A. (2007). AMBER Score in DOCK6: Application of  
363 molecular dynamics simulations and implicit solvent model (GB/SA) in protein-ligand  
364 docking. *Abstr Pap Am Chem S* *233*, 20-20.
- 365 Ryckaert J P , C.G., Berendsen H J C . (1976). Numerical integration of the cartesian  
366 equations of motion of a system with constraints: molecular dynamics of n-alkanes[J].  
367 *Journal of Computational Physics*, 327-341.
- 368 Sawai, H., Yamanaka, M., Sugimoto, H., Shiro, Y., and Aono, S. (2012). Structural  
369 Basis for the Transcriptional Regulation of Heme Homeostasis in Lactococcus lactis. *J*  
370 *Biol Chem* *287*, 30755-30768.
- 371 Seminario, J.M. (1996). Calculation of intramolecular force fields from second-  
372 derivative tensors. *Int J Quantum Chem* *60*, 1271-1277.
- 373 Taverna, P., Rendahl, K., Jekic-McMullen, D., Shao, Y., Aardalen, K., Salangsang, F.,  
374 Doyle, L., Moler, E., and Hibner, B. (2007). Tezacitabine enhances the DNA-directed  
375 effects of fluoropyrimidines in human colon cancer cells and tumor xenografts.  
376 *Biochem Pharmacol* *73*, 44-55.
- 377 Villarino, L., Splan, K.E., Reddem, E., Alonso-Cotchico, L., de Souza, C.G., Lledos, A.,  
378 Marechal, J.D., Thunnissen, A.M.W.H., and Roelfes, G. (2018). An Artificial Heme  
379 Enzyme for Cyclopropanation Reactions. *Angew Chem Int Edit* *57*, 7785-7789.
- 380 Wang, J.M., Wolf, R.M., Caldwell, J.W., Kollman, P.A., and Case, D.A. (2004).  
381 Development and testing of a general amber force field. *J Comput Chem* *25*, 1157-  
382 1174.

383 Weiser, J., Shenkin, P.S., and Still, W.C. (1999). Approximate solvent-accessible  
384 surface areas from tetrahedrally directed neighbor densities. *Biopolymers* *50*, 373-  
385 380.

386
